# Supplementary material for: Long-Term Follow-Up of a Phase I/II Study of ProSavin, a Lentiviral Vector Gene Therapy for Parkinson's Disease
Source: PubMed Central journal article supplement — Hum Gene Ther Clin Dev. 2018 Sep 17;29(3):148–55. doi: 10.1089/humc.2018.081 (PMC6157351; doi:10.1089/humc.2018.081), 2018-09-17
Supplement: Supp_Table1.pdf [file Supp_Table1.pdf]

**Supplementary Table S1. All drug-related adverse events—post DBS data excluded**

|                                                        | Number of events |          |        |       | Number of patients |
|--------------------------------------------------------|------------------|----------|--------|-------|--------------------|
|                                                        | Mild             | Moderate | Severe | Total |                    |
| <i>Total number of adverse events</i>                  | 86               | 6        | 2      | 94    | 15                 |
| <i>Nervous system disorders</i>                        | 62               | 3        | 1      | 67    | 15                 |
| Dyskinesia                                             | 29               | 2        | 1      | 32    | 11                 |
| On and off phenomenon                                  | 22               | 0        | 0      | 22    | 11                 |
| Headache                                               | 4                | 0        | 0      | 4     | 3                  |
| Akinesia                                               | 3                | 0        | 0      | 3     | 3                  |
| Balance disorder                                       | 1                | 0        | 0      | 1     | 1                  |
| Brain edema <sup>a</sup>                               | 1                | 0        | 0      | 1     | 1                  |
| Dysarthria                                             | 1                | 0        | 0      | 1     | 1                  |
| Speech disorder                                        | 1                | 0        | 0      | 1     | 1                  |
| Tremor                                                 | 0                | 1        | 0      | 1     | 1                  |
| <i>Psychiatric disorders</i>                           | 9                | 1        | 1      | 11    | 7                  |
| Delusional perception                                  | 3                | 0        | 0      | 3     | 3                  |
| Anxiety                                                | 1                | 1        | 0      | 2     | 2                  |
| Hallucination                                          | 2                | 0        | 0      | 2     | 2                  |
| Abnormal dreams                                        | 1                | 0        | 0      | 1     | 1                  |
| Acute psychosis                                        | 0                | 0        | 1      | 1     | 1                  |
| Confused state                                         | 1                | 0        | 0      | 1     | 1                  |
| Hallucination, visual                                  | 1                | 0        | 0      | 1     | 1                  |
| <i>Investigations</i>                                  | 7                | 0        | 0      | 7     | 5                  |
| Nuclear magnetic resonance imaging brain abnormal      | 3                | 0        | 0      | 3     | 3                  |
| Nuclear magnetic resonance imaging abnormal            | 2                | 0        | 0      | 2     | 2                  |
| Weight decreased                                       | 1                | 0        | 0      | 1     | 1                  |
| Weight increased                                       | 1                | 0        | 0      | 1     | 1                  |
| <i>Musculoskeletal and connective tissue disorders</i> | 4                | 0        | 0      | 4     | 4                  |
| Back pain                                              | 1                | 0        | 0      | 1     | 1                  |
| Musculoskeletal pain                                   | 1                | 0        | 0      | 1     | 1                  |
| Myalgia                                                | 1                | 0        | 0      | 1     | 1                  |
| Neck pain                                              | 1                | 0        | 0      | 1     | 1                  |
| <i>Injury, poisoning, and procedural complications</i> | 2                | 0        | 0      | 2     | 2                  |
| Fall                                                   | 1                | 0        | 0      | 1     | 1                  |
| Subdural hematoma <sup>b</sup>                         | 1                | 0        | 0      | 1     | 1                  |
| <i>Blood and lymphatic system disorders</i>            | 0                | 1        | 0      | 1     | 1                  |
| Anemia                                                 | 0                | 1        | 0      | 1     | 1                  |
| <i>Gastrointestinal disorders</i>                      | 1                | 0        | 0      | 1     | 1                  |
| Nausea                                                 | 1                | 0        | 0      | 1     | 1                  |
| <i>Renal and urinary disorders</i>                     | 0                | 1        | 0      | 1     | 1                  |
| Glomerulonephritis                                     | 0                | 1        | 0      | 1     | 1                  |

<sup>a</sup>Along the injection site only.<sup>b</sup>Bleeding under burr hole.
