# Supplementary material for: Long-Term Follow-Up of a Phase I/II Study of ProSavin, a Lentiviral Vector Gene Therapy for Parkinson's Disease
Source: PubMed Central journal article supplement — Hum Gene Ther Clin Dev. 2018 Sep 17;29(3):148–55. doi: 10.1089/humc.2018.081 (PMC6157351; doi:10.1089/humc.2018.081), 2018-09-17
Supplement: Supp_Table3.pdf [file Supp_Table3.pdf]

**Supplementary Table S3. All treatment-emergent adverse events**

|                                                        | Number of events |          |        |       | Number of patients |
|--------------------------------------------------------|------------------|----------|--------|-------|--------------------|
|                                                        | Mild             | Moderate | Severe | Total |                    |
| <i>Total number of adverse events</i>                  | 519              | 121      | 30     | 671   | 15                 |
| <i>Nervous system disorders</i>                        | 177              | 30       | 3      | 210   | 15                 |
| On and off phenomenon                                  | 57               | 6        | 0      | 63    | 15                 |
| Dyskinesia                                             | 42               | 5        | 1      | 48    | 14                 |
| Headache                                               | 20               | 2        | 0      | 22    | 13                 |
| Akinesia                                               | 13               | 4        | 1      | 18    | 9                  |
| Dysarthria                                             | 7                | 3        | 0      | 10    | 6                  |
| Dizziness                                              | 8                | 1        | 0      | 9     | 4                  |
| Cognitive disorder                                     | 2                | 3        | 0      | 5     | 4                  |
| Balance disorder                                       | 4                | 0        | 0      | 4     | 4                  |
| Somnolence                                             | 4                | 0        | 0      | 4     | 4                  |
| Tremor                                                 | 1                | 3        | 0      | 4     | 3                  |
| Paresthesia                                            | 3                | 0        | 0      | 3     | 3                  |
| Sciatica                                               | 3                | 0        | 0      | 3     | 1                  |
| Carpal tunnel syndrome                                 | 1                | 1        | 0      | 2     | 2                  |
| Frontotemporal dementia                                | 0                | 1        | 1      | 2     | 1                  |
| Speech disorder                                        | 2                | 0        | 0      | 2     | 2                  |
| Syncope                                                | 2                | 0        | 0      | 2     | 2                  |
| Anosmia                                                | 1                | 0        | 0      | 1     | 1                  |
| Apraxia                                                | 0                | 1        | 0      | 1     | 1                  |
| Brain edema                                            | 1                | 0        | 0      | 1     | 1                  |
| Cerebrovascular disorder                               | 1                | 0        | 0      | 1     | 1                  |
| Dystonia                                               | 1                | 0        | 0      | 1     | 1                  |
| Hyporeflexia                                           | 1                | 0        | 0      | 1     | 1                  |
| Neuralgia                                              | 1                | 0        | 0      | 1     | 1                  |
| Presyncope                                             | 1                | 0        | 0      | 1     | 1                  |
| Psychomotor hyperactivity                              | 1                | 0        | 0      | 1     | 1                  |
| <i>Injury, poisoning, and procedural complications</i> | 60               | 22       | 5      | 87    | 13                 |
| Fall                                                   | 32               | 8        | 2      | 42    | 11                 |
| Head injury                                            | 6                | 0        | 0      | 6     | 4                  |
| Joint injury                                           | 3                | 2        | 0      | 5     | 5                  |
| Confusion postoperative                                | 2                | 0        | 0      | 2     | 2                  |
| Facial bones fracture                                  | 0                | 2        | 0      | 2     | 1                  |
| Pelvic fracture                                        | 0                | 2        | 0      | 2     | 1                  |
| Procedural hypertension                                | 2                | 0        | 0      | 2     | 2                  |
| Pulmonary contusion                                    | 0                | 1        | 1      | 2     | 1                  |
| Rib fracture                                           | 2                | 0        | 0      | 2     | 2                  |
| Spinal compression fracture                            | 0                | 1        | 1      | 2     | 2                  |
| Tooth fracture                                         | 1                | 1        | 0      | 2     | 2                  |
| Contusion                                              | 1                | 0        | 0      | 1     | 1                  |
| Fracture                                               | 0                | 1        | 0      | 1     | 1                  |
| Injury                                                 | 1                | 0        | 0      | 1     | 1                  |
| Laceration                                             | 1                | 0        | 0      | 1     | 1                  |
| Ligament sprain                                        | 0                | 1        | 0      | 1     | 1                  |
| Muscle strain                                          | 1                | 0        | 0      | 1     | 1                  |
| Pneumothorax traumatic                                 | 0                | 0        | 1      | 1     | 1                  |
| Procedural headache                                    | 1                | 0        | 0      | 1     | 1                  |
| Procedural hypotension                                 | 1                | 0        | 0      | 1     | 1                  |
| Procedural nausea                                      | 1                | 0        | 0      | 1     | 1                  |
| Procedural pain                                        | 1                | 0        | 0      | 1     | 1                  |
| Road traffic accident                                  | 1                | 0        | 0      | 1     | 1                  |
| Sternal fracture                                       | 0                | 1        | 0      | 1     | 1                  |
| Subdural hematoma                                      | 1                | 0        | 0      | 1     | 1                  |
| Thermal burn                                           | 0                | 1        | 0      | 1     | 1                  |
| Traumatic hematoma                                     | 1                | 0        | 0      | 1     | 1                  |
| Upper limb fracture                                    | 0                | 1        | 0      | 1     | 1                  |
| Wound                                                  | 1                | 0        | 0      | 1     | 1                  |
| <i>Psychiatric disorders</i>                           | 54               | 14       | 5      | 73    | 14                 |
| Hallucination                                          | 12               | 4        | 0      | 16    | 7                  |
| Anxiety                                                | 11               | 1        | 0      | 12    | 8                  |
| Confused state                                         | 2                | 3        | 0      | 5     | 3                  |

(continued)

**Supplementary Table S3.** (Continued)

|                                                        | Number of events |          |          |           | Number of patients |
|--------------------------------------------------------|------------------|----------|----------|-----------|--------------------|
|                                                        | Mild             | Moderate | Severe   | Total     |                    |
| Apathy                                                 | 3                | 1        | 0        | 4         | 3                  |
| Delusional perception                                  | 4                | 0        | 0        | 4         | 4                  |
| Depression                                             | 1                | 1        | 2        | 4         | 4                  |
| Insomnia                                               | 4                | 0        | 0        | 4         | 4                  |
| Abnormal dreams                                        | 3                | 0        | 0        | 3         | 3                  |
| Drug dependence                                        | 2                | 1        | 0        | 3         | 1                  |
| Hallucination, visual                                  | 3                | 0        | 0        | 3         | 3                  |
| Sleep disorder                                         | 3                | 0        | 0        | 3         | 2                  |
| Depressed mood                                         | 2                | 0        | 0        | 2         | 2                  |
| Illusion                                               | 2                | 0        | 0        | 2         | 1                  |
| Panic attack                                           | 0                | 1        | 1        | 2         | 2                  |
| Acute psychosis                                        | 0                | 0        | 1        | 1         | 1                  |
| Agitation                                              | 0                | 1        | 0        | 1         | 1                  |
| Dysthymic disorder                                     | 0                | 1        | 0        | 1         | 1                  |
| Generalized anxiety disorder                           | 0                | 0        | 1        | 1         | 1                  |
| Irritability                                           | 1                | 0        | 0        | 1         | 1                  |
| Nightmare                                              | 1                | 0        | 0        | 1         | 1                  |
| <i>Musculoskeletal and connective tissue disorders</i> | <i>39</i>        | <i>9</i> | <i>1</i> | <i>50</i> | <i>15</i>          |
| Back pain                                              | 15               | 1        | 0        | 16        | 9                  |
| Musculoskeletal pain                                   | 4                | 2        | 0        | 6         | 5                  |
| Neck pain                                              | 5                | 1        | 0        | 6         | 5                  |
| Arthralgia                                             | 4                | 1        | 0        | 5         | 4                  |
| Osteoarthritis                                         | 2                | 1        | 0        | 3         | 3                  |
| Pain in extremity                                      | 3                | 0        | 0        | 3         | 3                  |
| Myalgia                                                | 2                | 0        | 0        | 2         | 1                  |
| Osteoporosis                                           | 2                | 0        | 0        | 2         | 2                  |
| Arthritis                                              | 1                | 0        | 0        | 1         | 1                  |
| Foot deformity                                         | 0                | 0        | 1        | 1         | 1                  |
| Intervertebral disc protrusion                         | 0                | 1        | 0        | 1         | 1                  |
| Muscle spasms                                          | 1                | 0        | 0        | 1         | 1                  |
| Musculoskeletal stiffness <sup>a</sup>                 | 0                | 0        | 0        | 1         | 1                  |
| Rheumatoid arthritis                                   | 0                | 1        | 0        | 1         | 1                  |
| Rotator cuff syndrome                                  | 0                | 1        | 0        | 1         | 1                  |
| <i>Infections and infestations</i>                     | <i>31</i>        | <i>8</i> | <i>4</i> | <i>43</i> | <i>12</i>          |
| Bronchitis                                             | 10               | 1        | 0        | 11        | 5                  |
| Infection                                              | 3                | 2        | 0        | 5         | 1                  |
| Urinary tract infection                                | 5                | 0        | 0        | 5         | 5                  |
| Fungal infection                                       | 3                | 0        | 0        | 3         | 3                  |
| Lung infection                                         | 1                | 2        | 0        | 3         | 1                  |
| Erysipelas                                             | 0                | 2        | 0        | 2         | 1                  |
| Nasopharyngitis                                        | 2                | 0        | 0        | 2         | 2                  |
| Rhinitis                                               | 2                | 0        | 0        | 2         | 2                  |
| Bacteriuria                                            | 1                | 0        | 0        | 1         | 1                  |
| Conjunctivitis                                         | 1                | 0        | 0        | 1         | 1                  |
| Helicobacter infection                                 | 1                | 0        | 0        | 1         | 1                  |
| Herpes zoster                                          | 1                | 0        | 0        | 1         | 1                  |
| Liver abscess                                          | 0                | 0        | 1        | 1         | 1                  |
| Peritonitis                                            | 0                | 0        | 1        | 1         | 1                  |
| Sepsis                                                 | 0                | 0        | 1        | 1         | 1                  |
| Septic shock                                           | 0                | 0        | 1        | 1         | 1                  |
| Tinea pedis                                            | 1                | 0        | 0        | 1         | 1                  |
| Tooth infection                                        | 0                | 1        | 0        | 1         | 1                  |
| <i>Gastrointestinal disorders</i>                      | <i>33</i>        | <i>4</i> | <i>1</i> | <i>38</i> | <i>15</i>          |
| Constipation                                           | 7                | 0        | 0        | 7         | 6                  |
| Nausea                                                 | 7                | 0        | 0        | 7         | 6                  |
| Vomiting                                               | 5                | 0        | 0        | 5         | 4                  |
| Gastritis                                              | 5                | 0        | 0        | 5         | 4                  |
| Gastroesophageal reflux disease                        | 4                | 0        | 0        | 4         | 3                  |
| Abdominal pain                                         | 0                | 2        | 0        | 2         | 1                  |
| Abdominal pain upper                                   | 2                | 0        | 0        | 2         | 2                  |
| Salivary hypersecretion                                | 2                | 0        | 0        | 2         | 2                  |

(continued)

**Supplementary Table S3.** (Continued)

|                                                             | Number of events |          |          |           | Number of patients |
|-------------------------------------------------------------|------------------|----------|----------|-----------|--------------------|
|                                                             | Mild             | Moderate | Severe   | Total     |                    |
| Diarrhea                                                    | 1                | 0        | 0        | 1         | 1                  |
| Dysphagia                                                   | 0                | 1        | 0        | 1         | 1                  |
| Hematochezia                                                | 0                | 1        | 0        | 1         | 1                  |
| Volvulus                                                    | 0                | 0        | 1        | 1         | 1                  |
| <i>General disorders and administration site conditions</i> | <i>23</i>        | <i>4</i> | <i>1</i> | <i>28</i> | <i>9</i>           |
| Edema peripheral                                            | 8                | 0        | 0        | 8         | 4                  |
| Chest pain                                                  | 3                | 2        | 0        | 5         | 3                  |
| Asthenia                                                    | 2                | 1        | 0        | 3         | 2                  |
| Drug intolerance                                            | 2                | 0        | 0        | 2         | 1                  |
| Hernia pain                                                 | 1                | 1        | 0        | 2         | 1                  |
| Hypothermia                                                 | 2                | 0        | 0        | 2         | 2                  |
| Pyrexia                                                     | 2                | 0        | 0        | 2         | 2                  |
| Malaise                                                     | 1                | 0        | 0        | 1         | 1                  |
| Edema                                                       | 1                | 0        | 0        | 1         | 1                  |
| Pain                                                        | 0                | 0        | 1        | 1         | 1                  |
| Polyp                                                       | 1                | 0        | 0        | 1         | 1                  |
| <i>Investigations</i>                                       | <i>23</i>        | <i>1</i> | <i>1</i> | <i>25</i> | <i>10</i>          |
| Nuclear magnetic resonance imaging brain abnormal           | 7                | 0        | 0        | 7         | 6                  |
| Weight decreased                                            | 3                | 1        | 1        | 5         | 3                  |
| Nuclear magnetic resonance imaging abnormal                 | 3                | 0        | 0        | 3         | 2                  |
| Chest scan                                                  | 2                | 0        | 0        | 2         | 2                  |
| Weight increased                                            | 2                | 0        | 0        | 2         | 2                  |
| Aspartate aminotransferase increased                        | 1                | 0        | 0        | 1         | 1                  |
| C-reactive protein increased                                | 1                | 0        | 0        | 1         | 1                  |
| Hematocrit decreased                                        | 1                | 0        | 0        | 1         | 1                  |
| Hemoglobin decreased                                        | 1                | 0        | 0        | 1         | 1                  |
| Red blood cell count decreased                              | 1                | 0        | 0        | 1         | 1                  |
| White blood cell count decreased                            | 1                | 0        | 0        | 1         | 1                  |
| <i>Respiratory, thoracic, and mediastinal disorders</i>     | <i>11</i>        | <i>4</i> | <i>1</i> | <i>16</i> | <i>8</i>           |
| Cough                                                       | 3                | 0        | 0        | 3         | 3                  |
| Pulmonary mass                                              | 3                | 0        | 0        | 3         | 3                  |
| Asthma                                                      | 1                | 1        | 0        | 2         | 2                  |
| Atelectasis                                                 | 0                | 0        | 1        | 1         | 1                  |
| Bronchospasm                                                | 1                | 0        | 0        | 1         | 1                  |
| Dysphonia                                                   | 1                | 0        | 0        | 1         | 1                  |
| Dyspnea exertional                                          | 0                | 1        | 0        | 1         | 1                  |
| Interstitial lung disease                                   | 1                | 0        | 0        | 1         | 1                  |
| Oropharyngeal pain                                          | 1                | 0        | 0        | 1         | 1                  |
| Pleural effusion                                            | 0                | 1        | 0        | 1         | 1                  |
| Pneumonia aspiration                                        | 0                | 1        | 0        | 1         | 1                  |
| <i>Vascular disorders</i>                                   | <i>10</i>        | <i>7</i> | <i>1</i> | <i>18</i> | <i>9</i>           |
| Hypertension                                                | 4                | 2        | 0        | 6         | 2                  |
| Temporal arteritis                                          | 1                | 2        | 1        | 4         | 1                  |
| Orthostatic hypotension                                     | 3                | 0        | 0        | 3         | 3                  |
| Hypotension                                                 | 1                | 1        | 0        | 2         | 2                  |
| Hot flush                                                   | 1                | 0        | 0        | 1         | 1                  |
| Jugular vein thrombosis                                     | 0                | 1        | 0        | 1         | 1                  |
| Phlebitis                                                   | 0                | 1        | 0        | 1         | 1                  |
| <i>Metabolism and nutrition disorders</i>                   | <i>11</i>        | <i>4</i> | <i>0</i> | <i>15</i> | <i>8</i>           |
| Diabetes mellitus                                           | 2                | 3        | 0        | 5         | 2                  |
| Hypertriglyceridemia                                        | 5                | 0        | 0        | 5         | 4                  |
| Decreased appetite                                          | 1                | 1        | 0        | 2         | 1                  |
| Dehydration                                                 | 1                | 0        | 0        | 1         | 1                  |
| Hypercholesterolemia                                        | 1                | 0        | 0        | 1         | 1                  |
| Hyperglycemia                                               | 1                | 0        | 0        | 1         | 1                  |
| <i>Skin and subcutaneous tissue disorders</i>               | <i>12</i>        | <i>4</i> | <i>0</i> | <i>16</i> | <i>7</i>           |
| Skin ulcer                                                  | 1                | 2        | 0        | 3         | 1                  |
| Psoriasis                                                   | 2                | 0        | 0        | 2         | 2                  |
| Rash                                                        | 2                | 0        | 0        | 2         | 2                  |
| Dermatitis allergic                                         | 1                | 0        | 0        | 1         | 1                  |
| Dermatitis diaper                                           | 1                | 0        | 0        | 1         | 1                  |

(continued)

**Supplementary Table S3.** (Continued)

|                                                                                  | Number of events |          |        |       | Number of patients |
|----------------------------------------------------------------------------------|------------------|----------|--------|-------|--------------------|
|                                                                                  | Mild             | Moderate | Severe | Total |                    |
| Eczema                                                                           | 0                | 1        | 0      | 1     | 1                  |
| Erythema                                                                         | 1                | 0        | 0      | 1     | 1                  |
| Hyperkeratosis                                                                   | 1                | 0        | 0      | 1     | 1                  |
| Livedo reticularis                                                               | 0                | 1        | 0      | 1     | 1                  |
| Papule                                                                           | 1                | 0        | 0      | 1     | 1                  |
| Skin lesion                                                                      | 1                | 0        | 0      | 1     | 1                  |
| Skin mass                                                                        | 1                | 0        | 0      | 1     | 1                  |
| <i>Renal and urinary disorders</i>                                               | 9                | 2        | 2      | 13    | 6                  |
| Micturition urgency                                                              | 2                | 0        | 1      | 3     | 3                  |
| Hematuria                                                                        | 1                | 0        | 0      | 1     | 1                  |
| Pollakiuria                                                                      | 2                | 0        | 0      | 2     | 2                  |
| Urinary incontinence                                                             | 1                | 1        | 0      | 2     | 2                  |
| Acute kidney injury                                                              | 0                | 0        | 1      | 1     | 1                  |
| Dysuria                                                                          | 1                | 0        | 0      | 1     | 1                  |
| Glomerulonephritis                                                               | 0                | 1        | 0      | 1     | 1                  |
| Nocturia                                                                         | 1                | 0        | 0      | 1     | 1                  |
| Renal cyst                                                                       | 1                | 0        | 0      | 1     | 1                  |
| <i>Cardiac disorders</i>                                                         | 5                | 1        | 1      | 7     | 5                  |
| Tachycardia                                                                      | 2                | 0        | 0      | 2     | 2                  |
| Arrhythmia                                                                       | 0                | 1        | 0      | 1     | 1                  |
| Cardiac failure                                                                  | 1                | 0        | 0      | 1     | 1                  |
| Cardio-respiratory arrest                                                        | 0                | 0        | 1      | 1     | 1                  |
| Palpitations                                                                     | 1                | 0        | 0      | 1     | 1                  |
| Sinus tachycardia                                                                | 1                | 0        | 0      | 1     | 1                  |
| <i>Ear and labyrinth disorders</i>                                               | 5                | 0        | 0      | 5     | 3                  |
| Vertigo                                                                          | 2                | 0        | 0      | 2     | 1                  |
| Cerumen impaction                                                                | 1                | 0        | 0      | 1     | 1                  |
| Ear discomfort                                                                   | 1                | 0        | 0      | 1     | 1                  |
| Hypoacusis                                                                       | 1                | 0        | 0      | 1     | 1                  |
| <i>Eye disorders</i>                                                             | 4                | 1        | 0      | 5     | 2                  |
| Diplopia                                                                         | 2                | 0        | 0      | 2     | 1                  |
| Blepharospasm                                                                    | 0                | 1        | 0      | 1     | 1                  |
| Cataract                                                                         | 1                | 0        | 0      | 1     | 1                  |
| Presbyopia                                                                       | 1                | 0        | 0      | 1     | 1                  |
| <i>Hepatobiliary disorders</i>                                                   | 1                | 1        | 3      | 5     | 2                  |
| Cholangitis                                                                      | 0                | 1        | 1      | 2     | 1                  |
| Hepatic artery aneurysm                                                          | 0                | 0        | 1      | 1     | 1                  |
| Hepatic steatosis                                                                | 1                | 0        | 0      | 1     | 1                  |
| Hepatic vein thrombosis                                                          | 0                | 0        | 1      | 1     | 1                  |
| <i>Blood and lymphatic system disorders</i>                                      | 1                | 2        | 1      | 4     | 3                  |
| Anemia                                                                           | 1                | 2        | 1      | 4     | 3                  |
| <i>Neoplasms benign, malignant, and unspecified (including cysts and polyps)</i> | 2                | 2        | 0      | 4     | 2                  |
| Hemangioma of bone                                                               | 0                | 2        | 0      | 2     | 1                  |
| Cerebral hygroma                                                                 | 1                | 0        | 0      | 1     | 1                  |
| Thyroid neoplasm                                                                 | 1                | 0        | 0      | 1     | 1                  |
| <i>Reproductive system and breast disorders</i>                                  | 3                | 1        | 0      | 4     | 4                  |
| Breast cyst                                                                      | 1                | 0        | 0      | 1     | 1                  |
| Erectile dysfunction                                                             | 1                | 0        | 0      | 1     | 1                  |
| Menstrual disorder                                                               | 1                | 0        | 0      | 1     | 1                  |
| Prostatitis                                                                      | 0                | 1        | 0      | 1     | 1                  |
| <i>Surgical and medical procedures</i>                                           | 3                | 0        | 0      | 3     | 2                  |
| Dental implantation                                                              | 2                | 0        | 0      | 2     | 1                  |
| Cholecystectomy                                                                  | 1                | 0        | 0      | 1     | 1                  |
| <i>Endocrine disorders</i>                                                       | 2                | 0        | 0      | 2     | 2                  |
| Goiter                                                                           | 1                | 0        | 0      | 1     | 1                  |
| Hypothyroidism                                                                   | 1                | 0        | 0      | 1     | 1                  |

<sup>a</sup>Adverse event severity is missing or unknown.
