# Supplementary material for: Long-Term Follow-Up of a Phase I/II Study of ProSavin, a Lentiviral Vector Gene Therapy for Parkinson's Disease
Source: PubMed Central journal article supplement — Hum Gene Ther Clin Dev. 2018 Sep 17;29(3):148–55. doi: 10.1089/humc.2018.081 (PMC6157351; doi:10.1089/humc.2018.081), 2018-09-17
Supplement: Supp_Table7.pdf [file Supp_Table7.pdf]

**Supplementary Table S7. PDQ-39—post DBS data excluded**

| <i>Patients</i>     | <i>Baseline</i> | <i>6 months</i> | <i>12 months</i> | <i>24 months</i> | <i>36 months</i> | <i>48 months</i> | <i>60 months</i> | <i>72 months</i> |
|---------------------|-----------------|-----------------|------------------|------------------|------------------|------------------|------------------|------------------|
| <i>PDQ-39 score</i> |                 |                 |                  |                  |                  |                  |                  |                  |
| L1                  | 36              | 15              | 12               | 15               | 20               | 30               | 53               | 43               |
| L2                  | 38              | 28              | 32               | 29               | 47               | 56               | 29               | 47               |
| L3                  | 47              | 24              | 27               | 15               | 26               | 32               | 35               | 37               |
| M4                  | NA              | 21              | 18               | 33               | 32               | 23               | 19               | NA               |
| M5                  | 15              | 17              | 17               | 16               | 20               | 31               | 21               | 21               |
| M6                  | 38              | 28              | 22               | 26               | 34               | 12               | 24               | 21               |
| M7                  | 16              | 17              | 18               | 27               | NA               | NA               | NA               | NA               |
| M8                  | 25              | 24              | 27               | 31               | NA               | NA               | NA               | NA               |
| M9                  | 59              | 57              | 78               | 61               | 53               | 53               | 64               | 52               |
| H10                 | 28              | 53              | 65               | 66               | 53               | 51               | 51               | NA               |
| H11                 | 35              | 33              | 31               | 39               | NA               | NA               | NA               | NA               |
| H12                 | 38              | 34              | 45               | 45               | 53               | 45               | NA               | NA               |
| H13                 | 26              | 18              | 31               | 33               | 27               | 39               | 35               | NA               |
| H14                 | 42              | 36              | 45               | NA               | NA               | NA               | NA               | NA               |
| H15                 | 22              | 15              | 13               | 14               | 15               | 16               | 27               | NA               |
